# Supplementary material for: A systematic machine learning and data type comparison yields metagenomic predictors of infant age, sex, breastfeeding, antibiotic usage, country of origin, and delivery type
Source: PLoS Comput Biol. 2020 May 11;16(5):e1007895. doi: 10.1371/journal.pcbi.1007895 (PMC7241849; doi:10.1371/journal.pcbi.1007895)
Supplement: S1 Table — (XLSX) [file pcbi.1007895.s003.xlsx]

## Sheet: Sheet1
Term	Acronym	Description (if relevant)
Elastic Net	EB
Random Forest	RF
Gradient Boosted Machine	GBM
Support Vector Machine	SVM
K-Nearest-Neighbors	KNN
Naïve Bayes	NB
Microbial feature		A single unit of observation within the human microbiome – for this paper, this term refers to either a species, pathway, co-abundance-group or gene
Data type		A type of microbial feature (e.g. species vs. genes)
Co-Abundance-Groups	CAGs	A group of co-occurring microbial genes
Pathways		A metabolic pathway as classified by BioCyc.
MetaPhlAn2 taxa/species		Microbial species identified by the MetaPhlAn2 algorithm
Demographic feature/phenotype		One of the features we were aiming to classify/predict (e.g. age). These are also the features that we adjusted for in the baseline model when we were not using them as our variable to be predicted.
Baseline model		A predictive model/classifier that only uses demographic data and not microbiome data.
Relative/predictor importance		The relevance of a given microbial feature for predicting a given phenotype
Area Under the Curve	AUC	A measure of predictive accuracy for a model – and AUC of 1 means a model exhibited perfect classification between groups, whereas an AUC of 0.5 means a model is doing no better than randomly choosing between classes.
