# Supplementary material for: A systematic machine learning and data type comparison yields metagenomic predictors of infant age, sex, breastfeeding, antibiotic usage, country of origin, and delivery type
Source: PLoS Comput Biol. 2020 May 11;16(5):e1007895. doi: 10.1371/journal.pcbi.1007895 (PMC7241849; doi:10.1371/journal.pcbi.1007895)
Supplement: S4 Table — (XLSX) [file pcbi.1007895.s006.xlsx]

## Sheet: Sheet1
Country (GBM2)			Antibiotic Usage (Elastic Net, Caret)			Exclusive Breastfeeding (GBM)			Sex (GBM)			Delivery Type (Elastic Net, Caret)
Gene ID	Relative Influence	Annotation	Gene ID	Regression Coefficients	Annotation	Gene ID	Relative Influence	Annotation	Gene ID	Relative Influence	Annotation	Gene ID	Regression_Coefficients	Annotation
MFFCJILA_07730	22.3688	hypothetical protein	MDIGPGIA_00359	0.111483	Outer membrane protein assembly factor BamA	ONIBFCNB_16172	11.9107	hypothetical protein	LKNEKEPA_09404	6.35201	hypothetical protein	KIEPLNOI_07273	-0.20376	hypothetical protein
EJFGAKPH_15235	12.0308	hypothetical protein	EGCNAGDG_46587	-0.0941794	Phosphatidyl-myo-inositol mannosyltransferase	EDHEJFGH_29992	3.4878	hypothetical protein	ACLIFMJN_00373	4.68136	hypothetical protein	MBBBCMDP_09157	-0.189325	hypothetical protein
CBOLBOED_15693	3.68941	hypothetical protein	IBHDMICK_04986	0.0442571	hypothetical protein	ONIBFCNB_32342	2.52392	hypothetical protein	FLBKCOGG_17437	3.96528	putative copper-transporting ATPase PacS	DGBMBBHC_38174	-0.124056	hypothetical protein
CBOLBOED_15687	2.95231	Putative HMP/thiamine import ATP-binding protein YkoD	MDIGPGIA_08139	0.0388875	Aspartate--tRNA(Asp/Asn) ligase	JLFEFHOB_19489	2.21273	hypothetical protein	JJEMBNJO_19231	3.95525	hypothetical protein	MGPELOCJ_01237	-0.12265	Modification methylase RsrI
IKEJBCIM_06120	2.54496	DNA polymerase IV	IJFOJKAB_14326	-0.0340951	Tyrosine recombinase XerD	MNMAMODL_08274	2.1684	hypothetical protein	PCEMAJKJ_30470	3.62163	hypothetical protein	IDIGEDLC_49227	-0.104055	hypothetical protein
OGMPKNND_12736	1.9852	hypothetical protein	FHPJPNIB_30838	-0.0288077	Polyphosphate kinase	PFHACHLJ_18554	2.1442	hypothetical protein	NIFDGHGK_28932	3.50923	hypothetical protein	EHNOJIKK_33433	-0.0964586	hypothetical protein
DGBMBBHC_23112	1.97826	Lipoprotein-releasing system ATP-binding protein LolD	KFJBNHGE_23910	-0.0272105	hypothetical protein	ONIBFCNB_02583	2.10255	hypothetical protein	LJOFBCAM_25572	3.41792	hypothetical protein	LADKDFAM_58839	-0.0899251	Amino-acid carrier protein AlsT
CBOLBOED_16746	1.97759	hypothetical protein	NCLDCOKA_158945	-0.0250904	hypothetical protein	JJEMBNJO_14416	2.06765	hypothetical protein	OAJCAJDC_01388	3.07919	hypothetical protein	MPDCNBPP_95484	-0.0889199	Regulatory protein BlaR1
OGMPKNND_12765	1.9048	hypothetical protein	IBHDMICK_26604	0.0241323	Alkaline phosphatase synthesis transcriptional regulatory protein PhoP	FABKJKHI_83903	1.7662	hypothetical protein	PCEMAJKJ_06925	2.32342	DNA topoisomerase 3	MPDCNBPP_76112	-0.0662346	Chromosome partition protein Smc
EKCIAHIK_00040	1.55877	hypothetical protein	LFNGIOCN_24980	-0.0229344	hypothetical protein	PFHACHLJ_14111	1.38139	hypothetical protein	IJMAEOOL_42212	2.16349	hypothetical protein	PKKEAEAG_24566	-0.0563934	hypothetical protein
DJHIAOOD_02072	1.5239	hypothetical protein	IBHDMICK_26990	0.0196399	Tellurite methyltransferase	PFHACHLJ_13845	1.30952	hypothetical protein	LJFKLIPM_04115	2.06341	hypothetical protein	MHIBIMKK_12540	-0.0559707	hypothetical protein
ALKEPFHD_02833	1.43727	Transcriptional activator protein CopR	LFNGIOCN_24981	-0.0194372	hypothetical protein	ABLGDBIA_07844	1.23472	Deoxyuridine 5'-triphosphate nucleotidohydrolase	GHJKNNDE_26201	2.03579	hypothetical protein	PLGFMGMD_45898	-0.0440104	Arginine transport system permease protein ArtQ
LLNKMJGI_00642	1.37435	putative response regulatory protein	IBHDMICK_39268	0.0194313	Diaminopimelate decarboxylase	PFHACHLJ_06163	1.23342	hypothetical protein	IDFHMIGD_01644	1.70264	hypothetical protein	ACLIFMJN_03897	-0.0396743	hypothetical protein
FCOFMHBB_03960	1.23953	hypothetical protein	CMFCFCLH_10106	-0.0183627	HTH-type transcriptional regulator Xre	EFECDLBE_29385	1.22816	hypothetical protein	MBIOMAEA_64438	1.69165	hypothetical protein	JIMAGOKF_50890	-0.0345294	hypothetical protein
FCGHJDGH_00196	1.16501	Tyrosine recombinase XerD	IBHDMICK_02168	0.0132821	putative transporter YycB	PFHACHLJ_07776	1.19753	hypothetical protein	PCEMAJKJ_01067	1.66048	hypothetical protein	IDIGEDLC_39830	-0.0263158	hypothetical protein
LLNKMJGI_49187	1.10621	Lipid-A-disaccharide synthase	IBHDMICK_18690	0.0128299	3-isopropylmalate dehydratase small subunit	CJCHGFIA_20973	1.17729	hypothetical protein	PEACKGJC_92861	1.39344	Glutamine--fructose-6-phosphate aminotransferase [isomerizing]	HIJCOMBG_06335	-0.0213761	Ribosomal RNA small subunit methyltransferase D
LJJFMNDG_00992	1.07229	hypothetical protein	LJKGHONE_19131	-0.0115454	Acetylornithine aminotransferase	JHACDCNK_38572	1.15928	hypothetical protein	BPKLAIIP_17998	1.38415	hypothetical protein	MBIOMAEA_46464	-0.0191654	hypothetical protein
PAHLDJHI_04256	1.02867	Melibiose carrier protein	IBHDMICK_26657	0.0110501	GDP-mannose-dependent alpha-(1-6)-phosphatidylinositol monomannoside mannosyltransferase	PFHACHLJ_17883	1.14	hypothetical protein	ODAAPFLO_02215	1.32284	ATP-dependent RNA helicase DeaD	MEALJIEM_22358	-0.0103751	hypothetical protein
BOOKHDJI_01768	1.0151	hypothetical protein	CMFCFCLH_29791	-0.00960259	Alpha-amylase	PFHACHLJ_15552	1.08612	hypothetical protein	HKBAKOEK_03605	1.23692	hypothetical protein	NNBIOAOG_04804	-0.0092912	hypothetical protein
OGGPDNBL_11700	1.00534	hypothetical protein	IBHDMICK_20133	0.00820232	Ferrous-iron efflux pump FieF	GDDCPGIM_07488	1.08583	hypothetical protein	FKGJBIBM_27043	1.08956	hypothetical protein	MFHNLJNC_20750	-0.00681848	hypothetical protein
OGMPKNND_12743	0.950512	hypothetical protein	KJMCNLJC_122241	-0.00597087	D-inositol 3-phosphate glycosyltransferase	ONIBFCNB_20560	1.07296	hypothetical protein	LCJLKEOM_28789	1.02084	hypothetical protein	CKKLEBPF_04323	-0.00649067	hypothetical protein
GNDDIEIB_03168	0.934633	hypothetical protein	IBHDMICK_28934	0.0055823	Acetyltransferase	ILLDBGAO_11769	1.03223	hypothetical protein	PCEMAJKJ_31696	0.981482	putative copper-transporting ATPase PacS	DGBMBBHC_29849	-0.00235007	hypothetical protein
JDLDAPFA_39420	0.906037	Sensor histidine kinase WalK	IBHDMICK_25890	0.00544223	S-adenosylmethionine synthase	NLNJBFDE_43261	0.995643	hypothetical protein	PCEMAJKJ_06927	0.958854	hypothetical protein	LNHABHNI_12959	-0.00155314	Modification methylase DpnIIB
NMBFJPED_04228	0.864912	hypothetical protein	OGMIPDBC_45749	-0.00508017	D-inositol 3-phosphate glycosyltransferase	ONIBFCNB_10066	0.960506	hypothetical protein	MMGAJEIB_47142	0.939038	hypothetical protein	ACLIFMJN_22535	-0.00134369	hypothetical protein
EMILPODD_12888	0.838872	Sensor histidine kinase WalK	IBHDMICK_02368	0.00313534	Thioredoxin reductase	PMKIPOON_57401	0.930127	GalNAc-alpha-(1->4)-GalNAc-alpha-(1->3)-diNAcBac-PP-undecaprenol alpha-1,4-N-acetyl-D-galactosaminyltransferase	GKBAACFH_02499	0.932004	hypothetical protein	GLGDLNAM_30067	-0.000802968	Amidase enhancer
OLBFHHOA_20768	0.81456	hypothetical protein	IBHDMICK_23681	0.00120008	FeS cluster assembly protein SufB	ONIBFCNB_33692	0.922636	3-deoxy-D-manno-octulosonic acid kinase	NCLDCOKA_11083	0.872036	hypothetical protein	MNIAPOKG_28882	0	hypothetical protein
HNIEDLKK_11046	0.803958	hypothetical protein	IBHDMICK_02164	0.000910136	Spermidine/putrescine-binding periplasmic protein	PFHACHLJ_11048	0.921856	hypothetical protein	AHLKFJAK_15729	0.828432	hypothetical protein	FJCINIDC_29067	0	hypothetical protein
EFECDLBE_46330	0.780194	hypothetical protein	IBHDMICK_24198	0.000869313	NADH dehydrogenase-like protein YjlD	HAAEKDKI_79275	0.919925	hypothetical protein	CFFAPELO_02928	0.824317	hypothetical protein	BJHEBIII_10559	0	hypothetical protein
BFCBMEEP_02329	0.747034	hypothetical protein	IBHDMICK_07739	0.000837685	Ribosomal RNA small subunit methyltransferase G	KMMCBMFB_05041	0.859106	hypothetical protein	FKGOGLMC_09571	0.798949	hypothetical protein	FKLKNFKF_24814	0	hypothetical protein
KGOCAAEP_00280	0.661748	hypothetical protein	IBHDMICK_01470	0.000642608	ATP-dependent helicase/nuclease subunit A	LMBOJAGG_45670	0.84748	hypothetical protein	MHHLOEIL_19783	0.794697	hypothetical protein	FLKLMCPN_46604	0	hypothetical protein
DHJMDABI_07791	0.648817	hypothetical protein	IBHDMICK_20134	0.000405697	putative cation efflux system protein	MJKFPDNG_07631	0.793635	hypothetical protein	FJNEEDOK_38393	0.7848	hypothetical protein	LMPOBGMH_14357	0	hypothetical protein
LFMLPCOD_05097	0.648147	hypothetical protein	IBHDMICK_16503	0.000202293	hypothetical protein	ONIBFCNB_08457	0.766471	hypothetical protein	NNMPFFPE_34453	0.770056	RNA polymerase sigma-H factor	OIKMLDLO_00216	0	hypothetical protein
LJJFMNDG_01450	0.627802	hypothetical protein	IBHDMICK_11761	0.000167822	Catabolite control protein A	OLEBAOJG_02573	0.764609	hypothetical protein	PJCABIHF_10030	0.760159	RNA polymerase-associated protein RapA	ODOGDOJG_41488	0	hypothetical protein
EJIDHGLI_41142	0.627781	hypothetical protein	IBHDMICK_38153	0.000161575	Putative multidrug resistance protein MdtD	ONIBFCNB_03935	0.7572	hypothetical protein	MJEGDDCM_54981	0.707134	hypothetical protein	LHCEJGGE_03161	0	hypothetical protein
IKJLCHPB_00915	0.612601	Elongation factor Ts	IBHDMICK_37724	6.83757e-05	hypothetical protein	KJOHKGGP_03159	0.746603	hypothetical protein	HLBCKKEE_17729	0.628165	hypothetical protein	AJDNIJPE_00026	0	Chromosome partition protein Smc
MDKGGANI_07698	0.550366	hypothetical protein	IBHDMICK_03646	2.77632e-05	DNA polymerase III subunit beta	ONIBFCNB_04331	0.743405	hypothetical protein	BFIEAGEI_61955	0.583087	hypothetical protein	BCLLGDPM_02662	0	hypothetical protein
HBOGFJIC_05304	0.545043	hypothetical protein	IBHDMICK_05960	0	Transketolase	DKAOLOCH_01335	0.742223	Pectate disaccharide-lyase	FKJPGHMP_36437	0.547155	hypothetical protein	LCCKDKLM_25406	0	hypothetical protein
JEKNEKDK_01978	0.518067	hypothetical protein	IBHDMICK_15620	0	hypothetical protein	LNDEOAEH_05412	0.721348	hypothetical protein	BMFHOMAK_25476	0.53403	hypothetical protein	LJOFBCAM_25572	0	hypothetical protein
EJFGAKPH_22220	0.513379	Aspartate-semialdehyde dehydrogenase	IBHDMICK_24497	0	Cell shape-determining protein MreC	PFHACHLJ_09404	0.651351	hypothetical protein	EHNOJIKK_25642	0.50947	hypothetical protein	HHAOLAAD_18662	0	hypothetical protein
IKJLCHPB_00094	0.492619	Ribonuclease H	IBHDMICK_21693	0	Phenylalanine--tRNA ligase beta subunit	EINLEANF_31904	0.642569	hypothetical protein	KGECCLDA_17096	0.492996	hypothetical protein	HMMKGMGM_08477	0	hypothetical protein
DGBMBBHC_08279	0.489065	hypothetical protein	EEADCIPA_63109	0	hypothetical protein	FNLPJAEN_18274	0.640841	hypothetical protein	GAOCICJL_22887	0.49226	hypothetical protein	BPMJNJMP_04078	0	hypothetical protein
DHDMDIKN_03100	0.465132	hypothetical protein	IBHDMICK_28720	0	Lipoteichoic acid synthase 2	PFFMMPGA_44709	0.610557	hypothetical protein	FNICGAHE_02892	0.459405	hypothetical protein	FFFFEFCF_71138	0	hypothetical protein
JJMCLCJA_41030	0.463655	hypothetical protein	IBHDMICK_07030	0	DNA repair protein RecN	ONIBFCNB_20781	0.595211	hypothetical protein	PKPAAABC_19829	0.456478	hypothetical protein	LHCEJGGE_03162	0	hypothetical protein
DGBMBBHC_50382	0.454129	hypothetical protein	IBHDMICK_34859	0	Bifunctional ribokinase/ribose-5-phosphate isomerase A	NLNJBFDE_43260	0.591121	putative symporter YjmB	CFIGLBAA_11615	0.455841	hypothetical protein	NONDEOJM_06257	0	hypothetical protein
FKNMIGNC_08226	0.453537	DNA primase	CMFCFCLH_17740	0	CDP-diacylglycerol--glycerol-3-phosphate 3-phosphatidyltransferase	KFJDHBJB_79349	0.57559	hypothetical protein	CMFCFCLH_37219	0.45037	hypothetical protein	MLLHMCKF_07702	0	hypothetical protein
OJPFCOPN_03152	0.445087	hypothetical protein	HPOLECII_21512	0	hypothetical protein	DGBMBBHC_38151	0.571918	hypothetical protein	LCELFCEK_47203	0.421366	hypothetical protein	EJAHPGGE_19532	0	hypothetical protein
HKBAKOEK_00258	0.440169	hypothetical protein	IBHDMICK_21784	0	Isoleucine 2-epimerase	FKLKNFKF_03391	0.558208	hypothetical protein	JAJPEFPK_13325	0.416978	hypothetical protein	FABKJKHI_32299	0	Tyrosine recombinase XerC
PLKFDOCE_00131	0.433514	hypothetical protein	IBHDMICK_26268	0	hypothetical protein	DMAHIJFC_07014	0.554546	Pectate disaccharide-lyase	DKFKAMKD_20713	0.407411	hypothetical protein	EHNOJIKK_13941	0	hypothetical protein
FDAIPFFM_00930	0.421519	hypothetical protein	EKCIAHIK_26520	0	Citrate synthase	ONIBFCNB_30075	0.543035	Phosphoribosylglycinamide formyltransferase	NLNJBFDE_01682	0.403561	hypothetical protein	NBDOBHLH_07869	0	hypothetical protein
FNHJEFEK_02164	0.420195	hypothetical protein	IBHDMICK_16938	0	GTPase HflX	FJNEEDOK_08461	0.530813	Modification methylase RsrI	IKGKFAML_37948	0.390836	hypothetical protein	EONOBONA_04598	0	hypothetical protein
BMONMHAG_02081	0.404465	hypothetical protein	CMFCFCLH_15045	0	hypothetical protein	ONIBFCNB_35869	0.517847	hypothetical protein	BPKLAIIP_10109	0.372003	hypothetical protein	ODGEPCGK_31806	0	hypothetical protein
KBAGOAJP_10940	0.397856	hypothetical protein	IACGBOJP_14665	0	ATP synthase subunit alpha	EKEKPFOH_19062	0.509264	hypothetical protein	FENDGCFL_59406	0.371731	Arginine transport system permease protein ArtQ	HFAANLGL_02618	0	hypothetical protein
GNGAJCDJ_14610	0.354019	hypothetical protein	IBHDMICK_38393	0	Phosphoglucomutase	MDIGPGIA_07966	0.507931	hypothetical protein	CFEIJMBD_11313	0.364132	hypothetical protein	FNICGAHE_00151	0	hypothetical protein
MNMAMODL_13375	0.352123	hypothetical protein	IBHDMICK_19342	0	Ribosomal RNA small subunit methyltransferase A	OINGOHHK_13507	0.506149	hypothetical protein	CHDBMNAJ_11118	0.363589	hypothetical protein	ENHNNMBJ_08960	0	hypothetical protein
CJOEHLFJ_01752	0.349938	hypothetical protein	IBHDMICK_32415	0	Dihydroxy-acid dehydratase	PFHACHLJ_13779	0.504016	hypothetical protein	ADKHHHGE_14944	0.363101	hypothetical protein	EINDDMNF_22571	0	Plasmid recombination enzyme
FAJOHMKN_09122	0.32491	hypothetical protein	AKMGLPKI_24251	0	2-dehydro-3-deoxyphosphooctonate aldolase	EHNOJIKK_13941	0.503226	hypothetical protein	BJLGMFCH_04659	0.362291	hypothetical protein	GOBOEPNH_25100	0	hypothetical protein
MBKFBJOL_00118	0.319832	hypothetical protein	IBHDMICK_26790	0	5-amino-6-(5-phospho-D-ribitylamino)uracil phosphatase YbjI	LHCEJGGE_10445	0.486095	hypothetical protein	KCKGHMLM_02172	0.361599	hypothetical protein	OFEPFOPK_04983	0	hypothetical protein
JPEEIOGH_31695	0.318763	putative type I restriction enzymeP M protein	AHEKMHAL_30147	0	hypothetical protein	KFJDHBJB_20926	0.484888	Maf-like protein YhdE	MHHLOEIL_19782	0.359553	hypothetical protein	MGADCGNO_02511	0	hypothetical protein
DIOBBNOI_01842	0.318243	hypothetical protein	IBHDMICK_23354	0	Putative N-acetyl-LL-diaminopimelate aminotransferase	PFHACHLJ_16995	0.482253	hypothetical protein	CHDBMNAJ_09870	0.357101	hypothetical protein	EFECDLBE_02756	0	hypothetical protein
LPENGCNG_01524	0.302203	hypothetical protein	IBHDMICK_18751	0	Thiamine-phosphate synthase	PFHACHLJ_01418	0.480225	hypothetical protein	CGADLKEC_91405	0.345389	hypothetical protein	MDKGGANI_20472	0	hypothetical protein
KFPBIFAE_08317	0.302045	hypothetical protein	IBHDMICK_36416	0	LOG family protein YvdD	BFIEAGEI_05905	0.473811	hypothetical protein	GHJKNNDE_43236	0.340987	hypothetical protein	EFECDLBE_47584	0	hypothetical protein
MFGHCHJF_00494	0.268692	Serine/alanine racemase	IBHDMICK_16116	0	Ribosomal RNA large subunit methyltransferase H	DCOGMIPG_55226	0.472588	putative symporter YjmB	KDHPKFPK_27831	0.34003	hypothetical protein	IDIGEDLC_39703	0	hypothetical protein
LFMLPCOD_24549	0.266621	hypothetical protein	IBHDMICK_33238	0	NAD-dependent protein deacetylase	GMABKCFD_16557	0.465176	hypothetical protein	JLJMICMG_03331	0.334277	hypothetical protein	BFCBMEEP_17270	0	Outer membrane protein 40
LPENGCNG_01535	0.258543	hypothetical protein	CMFCFCLH_09822	0	Bifunctional NAD(P)H-hydrate repair enzyme Nnr	IGGINELA_71636	0.457985	hypothetical protein	HNHGOKAL_94821	0.333398	hypothetical protein	KCBHEHCB_29953	0	hypothetical protein
FBIPEEJI_12245	0.250978	hypothetical protein	IBHDMICK_12622	0	DNA processing protein DprA	NCLDCOKA_164018	0.45572	hypothetical protein	LALOLIDH_00681	0.331752	hypothetical protein	BMNJMEDA_54022	0	hypothetical protein
CBOLBOED_16744	0.239049	hypothetical protein	IBHDMICK_09784	0	Riboflavin transporter RibZ	HHAOLAAD_18662	0.45369	hypothetical protein	ACLIFMJN_02037	0.319623	hypothetical protein	BMCPBNNC_11310	0	hypothetical protein
GPICEKIO_00880	0.227025	N-acetylmuramoyl-L-alanine amidase domain-containing protein	EIDENJKF_22303	0	hypothetical protein	PHIDOOJI_06342	0.442702	hypothetical protein	IJDPOMGK_12294	0.31902	hypothetical protein	BCAMGNPA_23656	0	hypothetical protein
FKNMIGNC_01236	0.222402	hypothetical protein	CMFCFCLH_30362	0	hypothetical protein	DILOOPPE_64410	0.441611	hypothetical protein	MGMDEBEP_06697	0.312249	hypothetical protein	CJCHGFIA_20973	0	hypothetical protein
HOBAHEGH_01781	0.218957	hypothetical protein	IBHDMICK_21520	0	Non-canonical purine NTP pyrophosphatase	KGFNGCOP_02592	0.437493	hypothetical protein	LMPOBGMH_03396	0.305916	hypothetical protein	EFECDLBE_47588	0	hypothetical protein
AKMGLPKI_07702	0.218458	hypothetical protein	FPIAKNBN_05848	0	hypothetical protein	ONIBFCNB_12799	0.435675	hypothetical protein	ACMAHCGK_30167	0.300084	hypothetical protein	BPMJNJMP_06154	0	hypothetical protein
OGMPKNND_12778	0.214251	hypothetical protein	IBHDMICK_10002	0	ATP-dependent helicase/deoxyribonuclease subunit B	ONIBFCNB_05944	0.431252	hypothetical protein	NMHNDOGA_06774	0.299828	hypothetical protein	MOIPKBCB_14048	0	hypothetical protein
GNGAJCDJ_16074	0.211885	hypothetical protein	IBHDMICK_19937	0	Ribonuclease M5	PFHACHLJ_14944	0.427515	hypothetical protein	FKGOGLMC_23461	0.297254	hypothetical protein	CHJCJAIH_05581	0	hypothetical protein
IMNIPGNC_07574	0.201846	hypothetical protein	IBHDMICK_27614	0	hypothetical protein	AKLDLIJK_05590	0.424407	hypothetical protein	IDFHMIGD_00806	0.296997	RNA polymerase-associated protein RapA	MKFMLMGJ_09130	0	hypothetical protein
BDNJPDEE_05736	0.198357	hypothetical protein	IBHDMICK_39637	0	Putative glutamine amidotransferase	MGPELOCJ_01237	0.404589	Modification methylase RsrI	NONDEOJM_14862	0.291355	hypothetical protein	NJFGOCGI_08843	0	hypothetical protein
PPDFLINB_00485	0.195836	hypothetical protein	CMFCFCLH_15042	0	hypothetical protein	ONIBFCNB_38381	0.400953	hypothetical protein	MOIPKBCB_42125	0.287238	hypothetical protein	EFECDLBE_02754	0	hypothetical protein
OLJLLADC_43791	0.190645	Sensory transduction protein regX3	CMFCFCLH_03222	0	hypothetical protein	NLNJBFDE_43264	0.387822	hypothetical protein	KOOGFPIH_26305	0.28379	hypothetical protein	LKNEKEPA_18494	0	hypothetical protein
BMHINANI_01672	0.186599	hypothetical protein	IBHDMICK_22738	0	Putative fructokinase	FBIPEEJI_00226	0.383196	hypothetical protein	PCEMAJKJ_30469	0.281442	hypothetical protein	EFECDLBE_38982	0	hypothetical protein
PLKFDOCE_00856	0.185488	Putative prophage phiRv2 integrase	EGCNAGDG_35735	0	GDP-mannose-dependent alpha-(1-6)-phosphatidylinositol monomannoside mannosyltransferase	NJCHIIAN_25287	0.373675	hypothetical protein	JLFEFHOB_43417	0.276374	hypothetical protein	EFECDLBE_02761	0	hypothetical protein
MPDCNBPP_91363	0.180113	hypothetical protein	IBHDMICK_38993	0	Tetracycline resistance protein, class B	GNDDIEIB_05020	0.37339	Nickel-binding periplasmic protein	DBGBEBEB_13211	0.264075	hypothetical protein	OBNNGBBL_03440	0	hypothetical protein
LJJFMNDG_01252	0.178311	hypothetical protein	EEFBIKPI_78989	0	Bicarbonate transport system permease protein CmpB	OGMPKNND_41640	0.373099	hypothetical protein	FPCDNEIP_20785	0.258648	hypothetical protein	EDKPGONB_15012	0	hypothetical protein
INDPKNCI_15680	0.174592	hypothetical protein	GMENMLFJ_05063	0	hypothetical protein	DOJFCKGA_19401	0.367235	Sporulation initiation inhibitor protein Soj	HJMIFKAL_10820	0.257174	hypothetical protein	NNBMIJJH_19666	0	hypothetical protein
DPLKIHPG_13716	0.173112	hypothetical protein	CMFCFCLH_42140	0	Flagellum site-determining protein YlxH	ONIBFCNB_21584	0.363938	hypothetical protein	PCEMAJKJ_06926	0.253697	hypothetical protein	LHDLHOPM_42088	0	hypothetical protein
JDOHBLPK_03816	0.172255	Chromosome-partitioning protein Spo0J	DPIBFMHE_24242	0	Glutamine--fructose-6-phosphate aminotransferase [isomerizing]	CMCJLMPA_06787	0.340184	Gluconate 5-dehydrogenase	HBPFODGJ_19256	0.250274	hypothetical protein	ODOGDOJG_05675	0	hypothetical protein
BDNJPDEE_03350	0.171628	hypothetical protein	IBHDMICK_23052	0	Putative HMP/thiamine permease protein YkoC	EHNOJIKK_24225	0.338338	hypothetical protein	HDIABJPB_27719	0.241461	hypothetical protein	CHJCJAIH_15881	0	hypothetical protein
AKMGLPKI_07698	0.171187	hypothetical protein	IBHDMICK_25108	0	Bifunctional ribokinase/ribose-5-phosphate isomerase A	GGHLHHLB_04673	0.315639	hypothetical protein	KCMPCCOH_27933	0.238508	hypothetical protein	FCJGAJBI_16145	0	hypothetical protein
NNFABDIJ_02949	0.168858	hypothetical protein	IBHDMICK_18741	0	Bifunctional ligase/repressor BirA	ONIBFCNB_36909	0.308034	hypothetical protein	HBPFODGJ_08655	0.226795	hypothetical protein	MICMCBIA_21193	0	hypothetical protein
LJJFMNDG_00688	0.167235	hypothetical protein	CMFCFCLH_42147	0	hypothetical protein	HEMCEAFD_38162	0.307289	hypothetical protein	KOMIDDMN_12387	0.226782	hypothetical protein	KEPBBKBD_37948	0	hypothetical protein
BDNJPDEE_04269	0.163263	hypothetical protein	IBHDMICK_37862	0	hypothetical protein	NNBIOAOG_04804	0.305684	hypothetical protein	IDACJAID_44599	0.226647	hypothetical protein	AJDNIJPE_31763	0	hypothetical protein
HAPBJMED_26986	0.16137	hypothetical protein	IBHDMICK_38606	0	Serine/threonine exchanger SteT	ONIBFCNB_36895	0.287361	hypothetical protein	FDIEJKKI_13237	0.2252	DNA-invertase hin	KJMCNLJC_134246	0	hypothetical protein
KGPDLOFB_40438	0.158335	hypothetical protein	CMFCFCLH_29803	0	tRNA-specific adenosine deaminase	FJNEEDOK_23853	0.281475	Pectate disaccharide-lyase	DGHOFGGA_93964	0.222947	Endolytic murein transglycosylase	GGEIOHBM_15886	0	hypothetical protein
DIOBBNOI_26639	0.149869	Flagellar biosynthetic protein FlhB	IBHDMICK_07240	0	DNA topoisomerase 1	CNMODCJP_06260	0.275844	hypothetical protein	NJCHIIAN_48793	0.214025	Triosephosphate isomerase	MKFMLMGJ_05670	0	hypothetical protein
PHGDMAIE_35435	0.149199	hypothetical protein	IBHDMICK_13083	0	2-succinyl-5-enolpyruvyl-6-hydroxy-3-cyclohexene-1-carboxylate synthase	EFECDLBE_38979	0.269199	hypothetical protein	NAEHACNL_01261	0.210564	hypothetical protein	EFECDLBE_02762	0	hypothetical protein
FMGEGLGK_08895	0.149068	hypothetical protein	GMENMLFJ_14992	0	hypothetical protein	NMBFJPED_09123	0.268507	hypothetical protein	NMHNDOGA_22689	0.205234	hypothetical protein	AJDNIJPE_15083	0	hypothetical protein
IBHDMICK_28176	0.142371	hypothetical protein	CMFCFCLH_33074	0	Spore protein YabP	NEJFFDKM_39822	0.265513	hypothetical protein	IMKGPLFG_20673	0.195966	hypothetical protein	EFECDLBE_38975	0	hypothetical protein
GAEFIJPN_11275	0.140443	hypothetical protein	IBHDMICK_22079	0	Bifunctional purine biosynthesis protein PurH	PFHIPBDO_13173	0.255079	hypothetical protein	IMKGPLFG_26740	0.194878	hypothetical protein	CMFCFCLH_05543	0	hypothetical protein
LCJGPOON_17294	0.135882	hypothetical protein	GMENMLFJ_47802	0	hypothetical protein	MHIBIMKK_06138	0.254529	hypothetical protein	KIEPLNOI_09013	0.194717	hypothetical protein	CMFCFCLH_26677	0	hypothetical protein
MBBBCMDP_00363	0.135187	hypothetical protein	IBHDMICK_16585	0	Oligo-1,6-glucosidase 1	FKBGBHJP_27156	0.252127	Cobyric acid synthase	PLDHNPOO_05780	0.191664	hypothetical protein	ODOGDOJG_41090	0	hypothetical protein
AOLLEJGB_08654	0.131849	DNA primase	IBHDMICK_05995	0	2,3-bisphosphoglycerate-dependent phosphoglycerate mutase	EFECDLBE_02746	0.250183	hypothetical protein	JDFHNBGJ_48356	0.190389	hypothetical protein	LHDLHOPM_37362	0	hypothetical protein
HNIEDLKK_04490	0.131789	hypothetical protein	IBHDMICK_02253	0	Periplasmic dipeptide transport protein	IDIGEDLC_39830	0.246638	hypothetical protein	HCJCGPGO_08026	0.189699	hypothetical protein	DIDKEHII_20785	0	hypothetical protein
JDOHBLPK_04887	0.131293	Taurine import ATP-binding protein TauB	IBHDMICK_21725	0	Phosphate acyltransferase	DHBKILDC_25958	0.243984	hypothetical protein	OPFJAGEE_44175	0.189272	hypothetical protein	LGLHGDNL_26708	0	hypothetical protein
